# Supplementary material
Source: PubMed Central journal article supplement (PMC3076096)

# Supplementary Figure 1

**a**

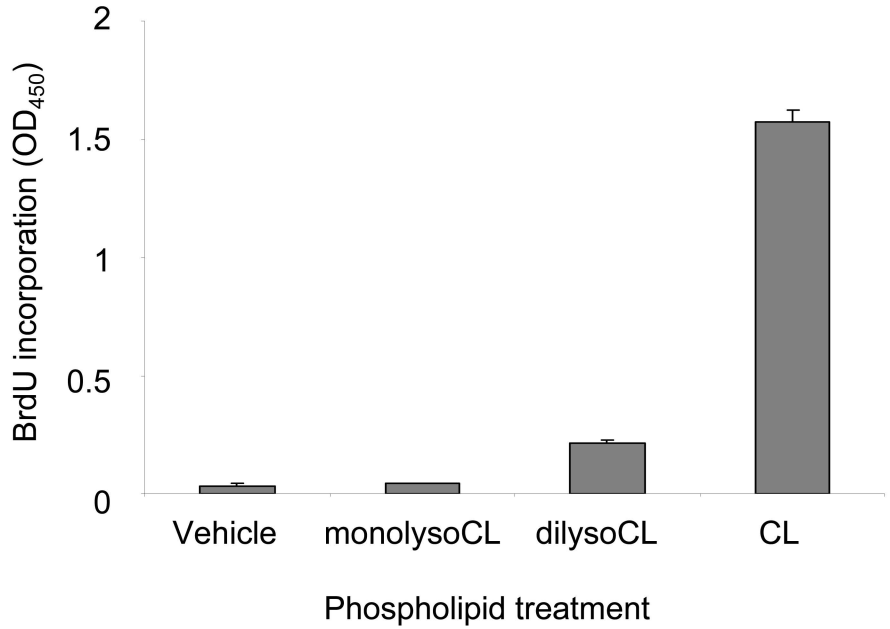

**b**

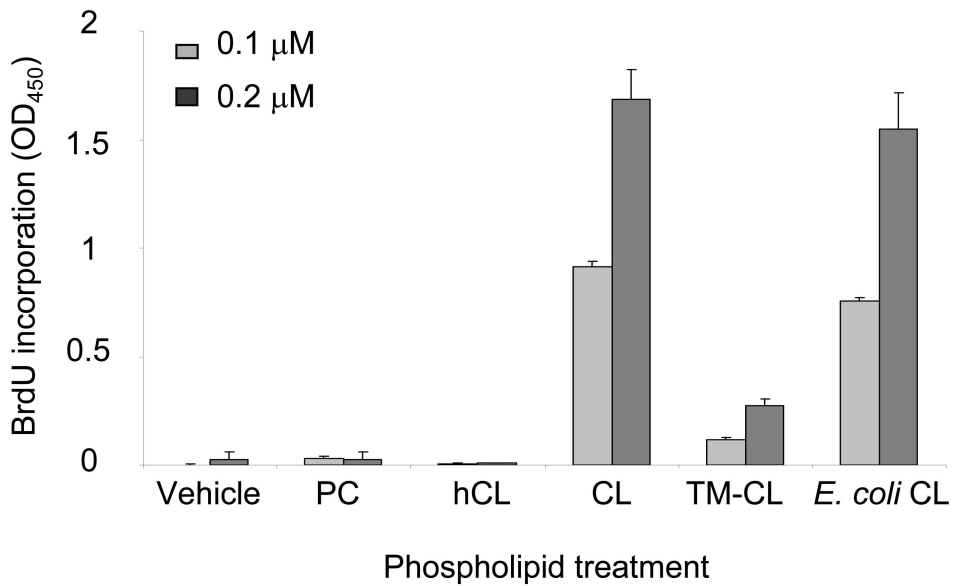

# Supplementary Figure 2

**a**

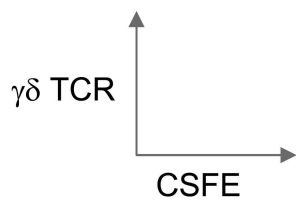

Vehicle

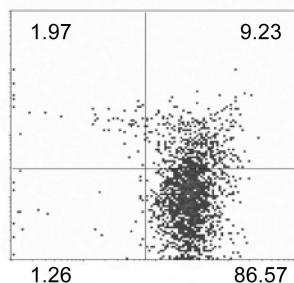

PC

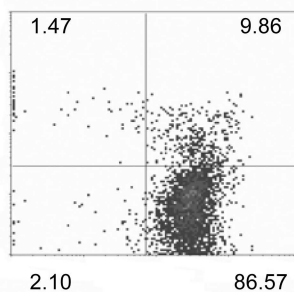

hCL

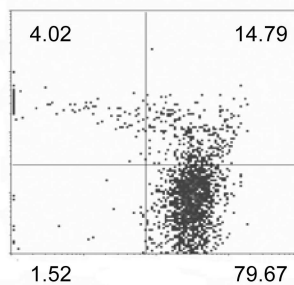

CL

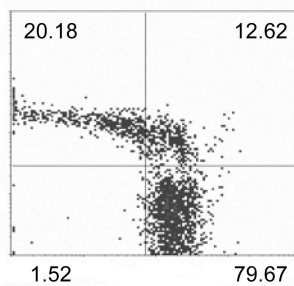

**b**

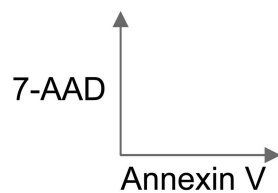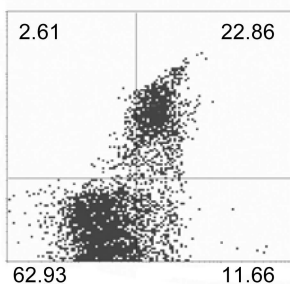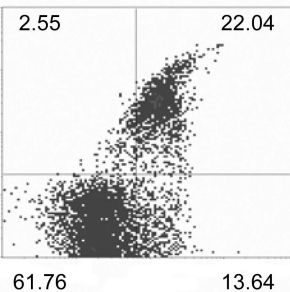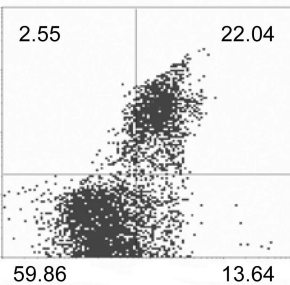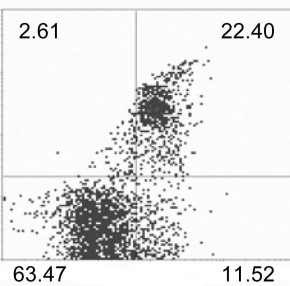

# Supplementary Figure 3

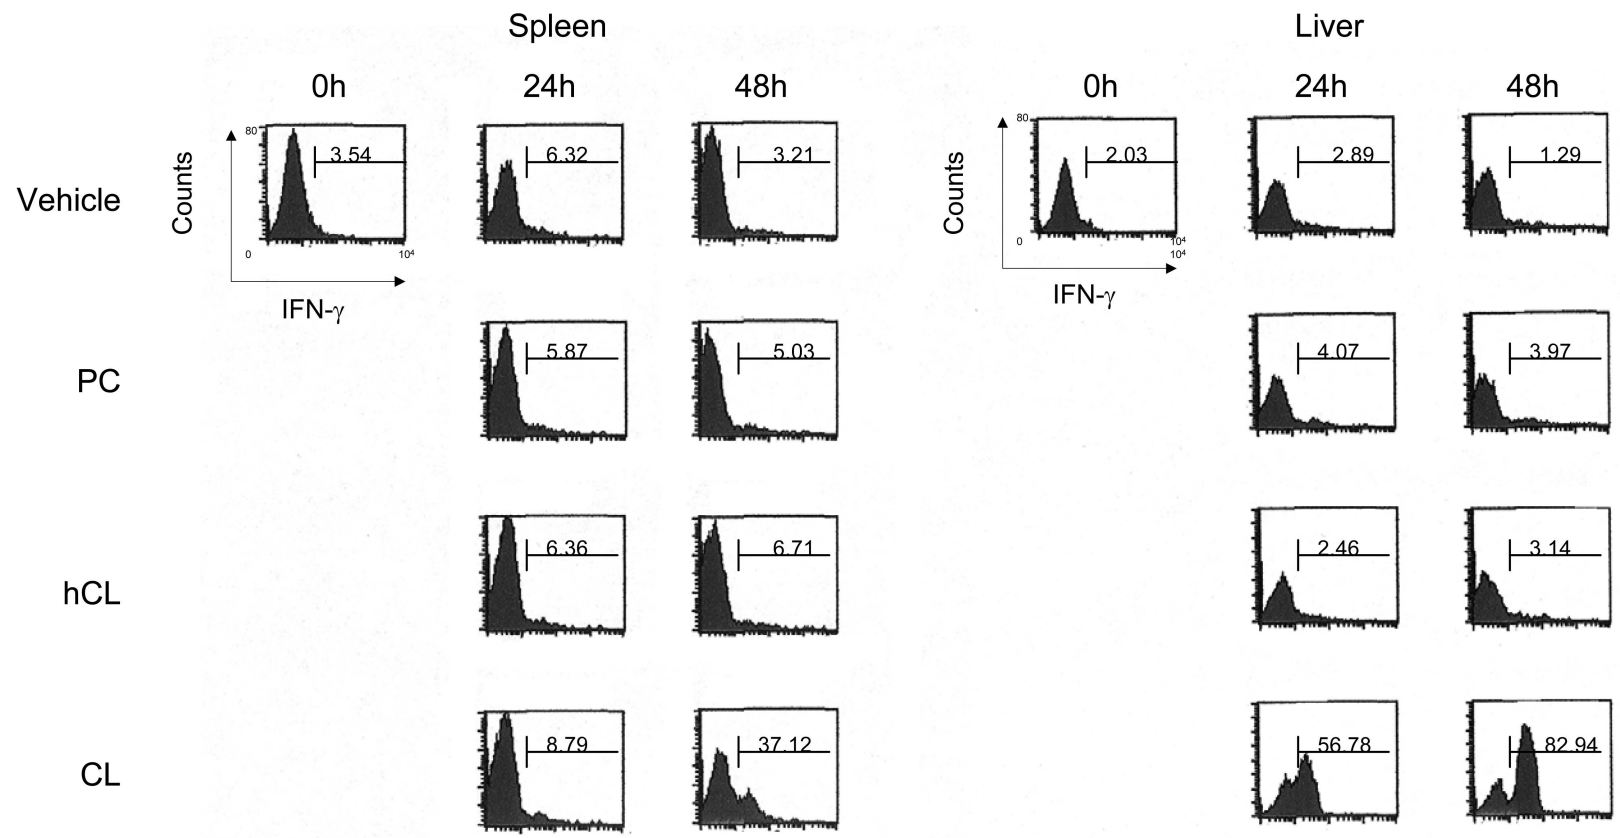

# Supplementary Figure 4

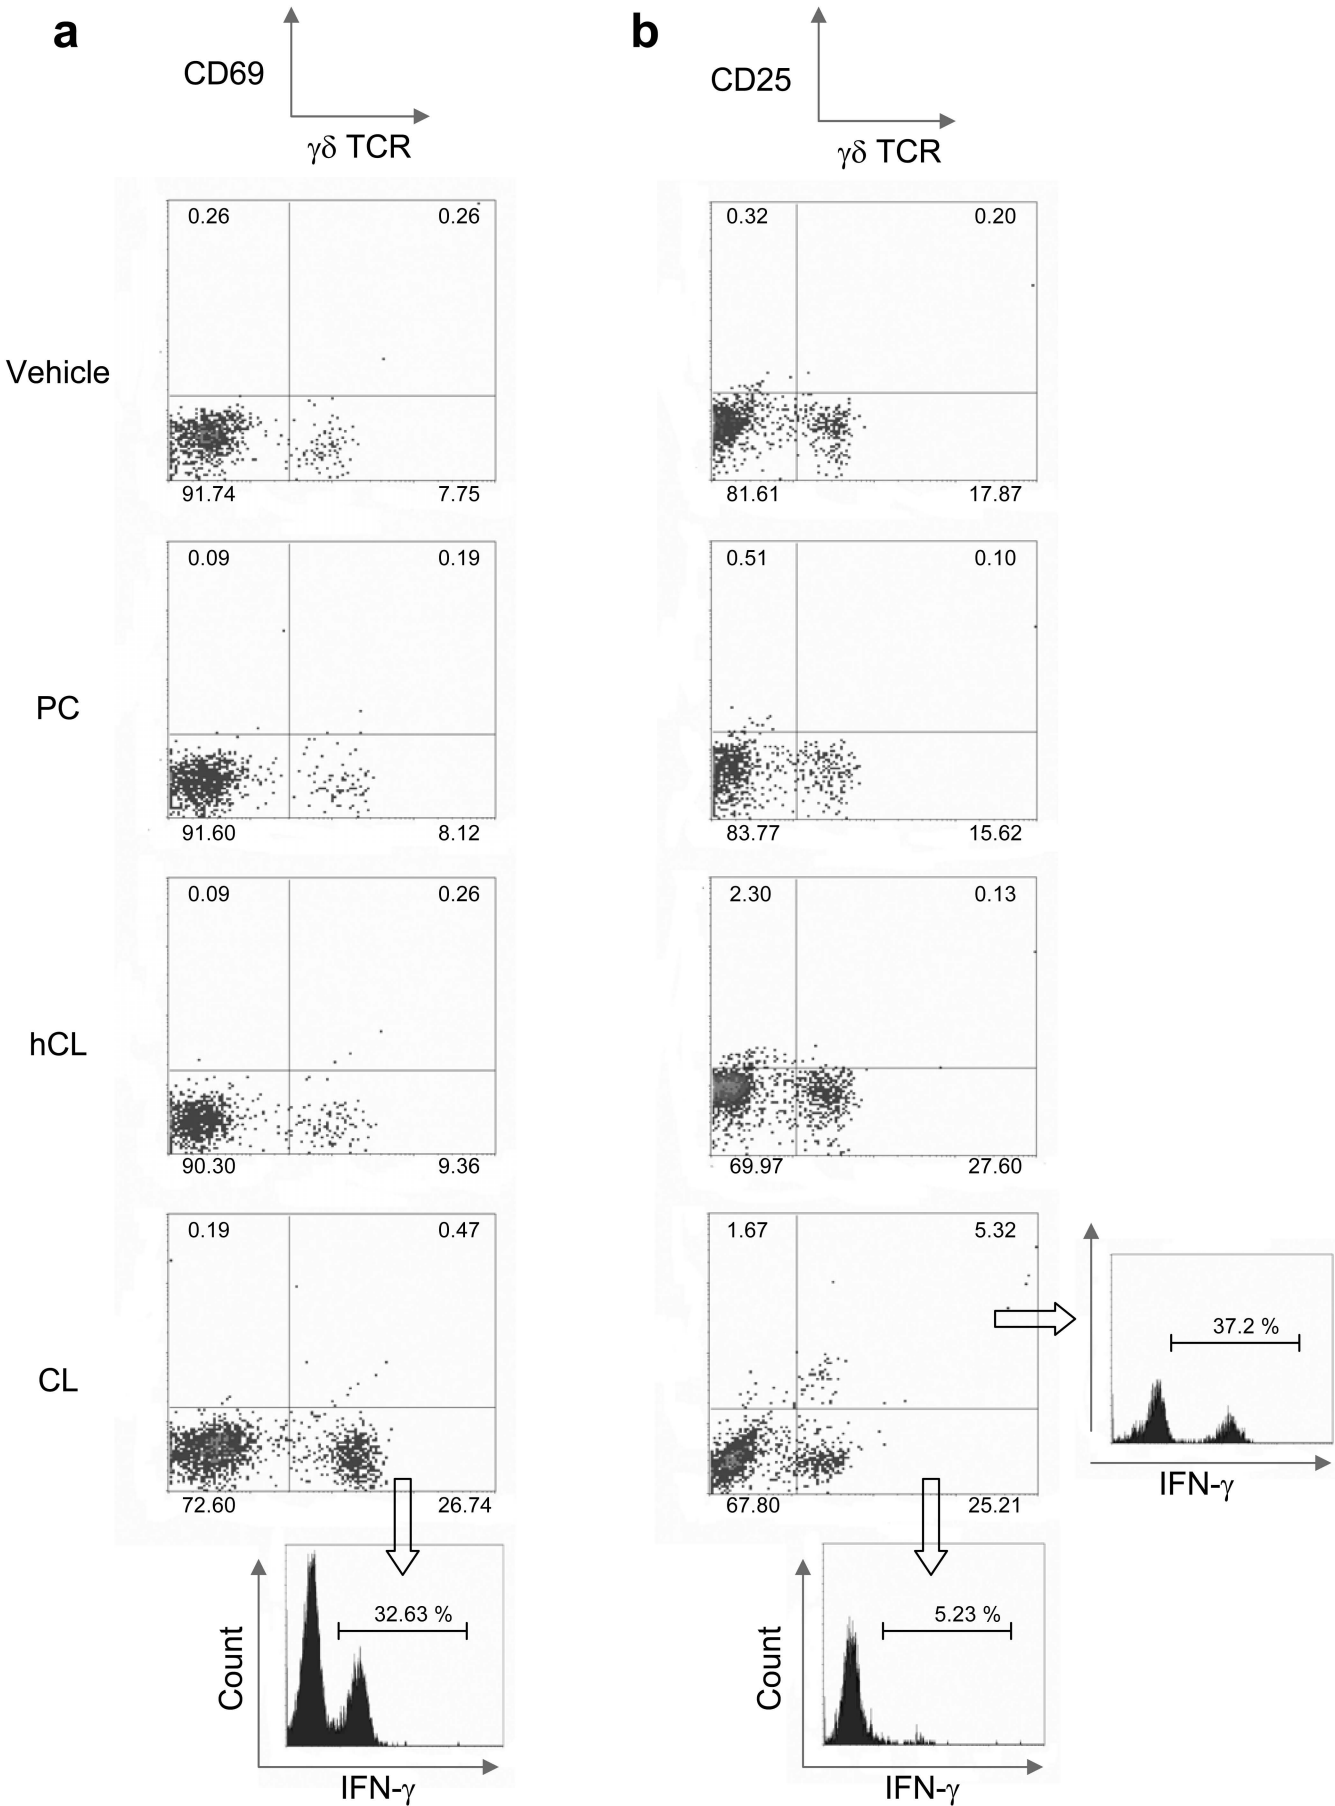

Supplement: NIHMS280495-supplement-Supplementary_Figures.pdf [file NIHMS280495-supplement-Supplementary_Figures.pdf]
